# Supplementary material for: Urinary Sodium Excretion and Adherence to the Mediterranean Diet in Older Adults
Source: MDPI journal article supplement (doi:10.3390/nu14010061), 2021-12-24
Supplement: s1 [file s1]

Supplementary Table S1. Descriptive statistics of urinary sodium excretion (mg/day) and PREDIMED score

| Sodium excretion (mg/day)                            |       |      |
|------------------------------------------------------|-------|------|
|                                                      | Women | Men  |
| Mean                                                 | 2937  | 3807 |
| Percentile 25                                        | 2092  | 2736 |
| Percentile 50                                        | 2782  | 3678 |
| Percentile 75                                        | 3609  | 4667 |
| Adherence to the Mediterranean Diet (PREDIMED score) |       |      |
|                                                      | Women | Men  |
| Mean                                                 | 9.06  | 9.12 |
| Percentile 25                                        | 8     | 8    |
| Percentile 50                                        | 9     | 9    |
| Percentile 75                                        | 10    | 11   |

Supplementary Table S2. Medians of sodium excretion according to categories of Mediterranean Diet adherence.

| Sodium excretion (median mg/day) |                             |                              |         |
|----------------------------------|-----------------------------|------------------------------|---------|
|                                  | Low Adherence to<br>MedDiet | High Adherence to<br>MedDiet | P value |
| Women                            | 2944                        | 2633                         | 0.004   |
| Men                              | 3588                        | 3749                         | 0.182   |
